# Supplementary material for: Room-temperature ferromagnetism, half-metallicity and spin transport in monolayer CrSc2Te4-based magnetic tunnel junction devices
Source: Royal Society of Chemistry journal article supplement (doi:10.1039/d4cp01660b), 2024-01-01
Supplement: d4cp01660b1.pdf [file d4cp01660b1.pdf]

# Room-temperature Ferromagnetism, Half-metallicity and Spin Transport in Monolayer CrSc<sub>2</sub>Te<sub>4</sub>-Based Magnetic Tunnel Junction Devices

Ruixue Yue,<sup>†ab</sup> Xuemin Su,<sup>†c</sup> Xiaodong Lv,<sup>\*ab</sup> Bingwen Zhang,<sup>d</sup> Shaolong Su,<sup>ab</sup>

Haipeng Li,<sup>ab</sup> Shaoqiang Guo<sup>\*c</sup> and Jian Gong<sup>\*abe</sup>

<sup>a</sup> College of Physics and Electronic Information, Inner Mongolia Normal University, Hohhot, 010022, China

<sup>b</sup> Inner Mongolia Key Laboratory for Physics and Chemistry of Functional Materials, Inner Mongolia Normal University, Hohhot, 010022, China

<sup>c</sup> School of Physical Science and Technology, Inner Mongolia University, Hohhot 010021, China

<sup>d</sup> Fujian Key Laboratory of Functional Marine Sensing Materials, Minjiang University, Fuzhou, 350108, China

<sup>e</sup> Ordos Institute of Technology, Ordos, 017000, China

\*Corresponding authors: 20230008@imnu.edu.cn (XL); shaoqiangguo@imu.edu.cn (SG); ndgong@imu.edu.cn (JG)

<sup>†</sup> R. Yue and X. Su contributed equally in this work.

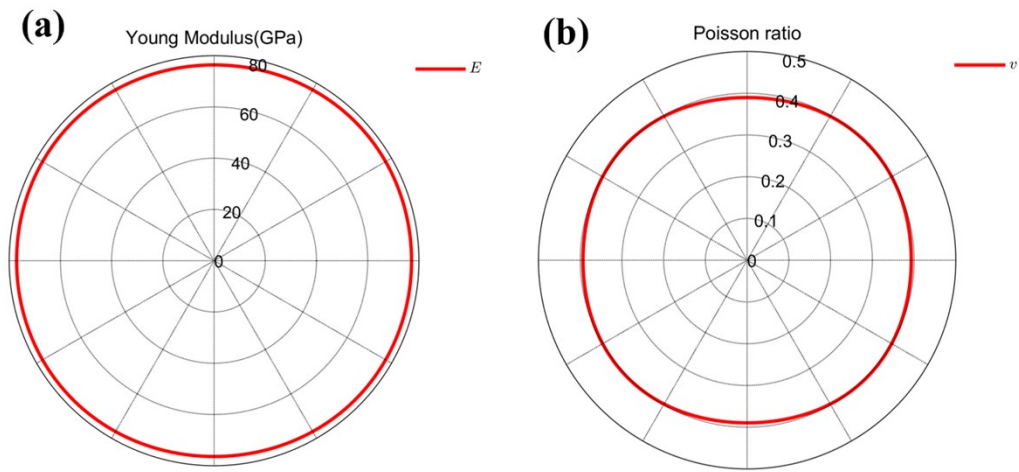

**Fig. S1** Calculated orientation-dependent Young's modulus  $Y(\theta)$  and Poisson's ratio  $\nu(\theta)$  for  $\text{CrSc}_2\text{Te}_4$  monolayer, respectively.

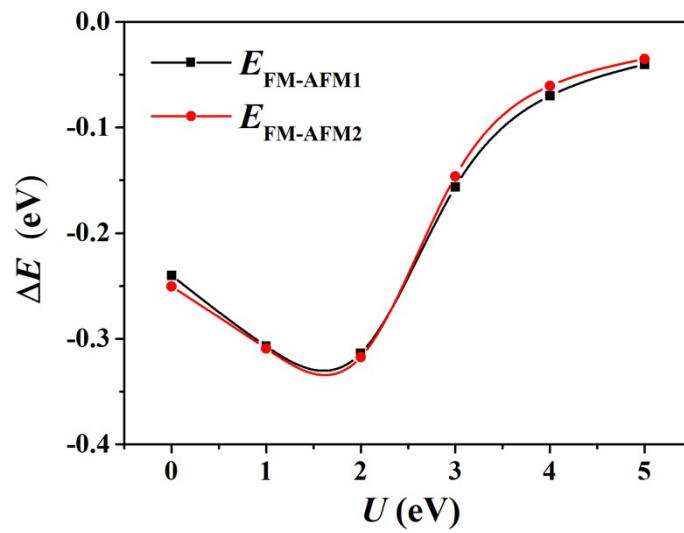

**Fig. S2** The calculated energy differences between FM and AFM states for  $\text{CrSc}_2\text{Te}_4$  monolayer with different  $U$  values using the PBE method.

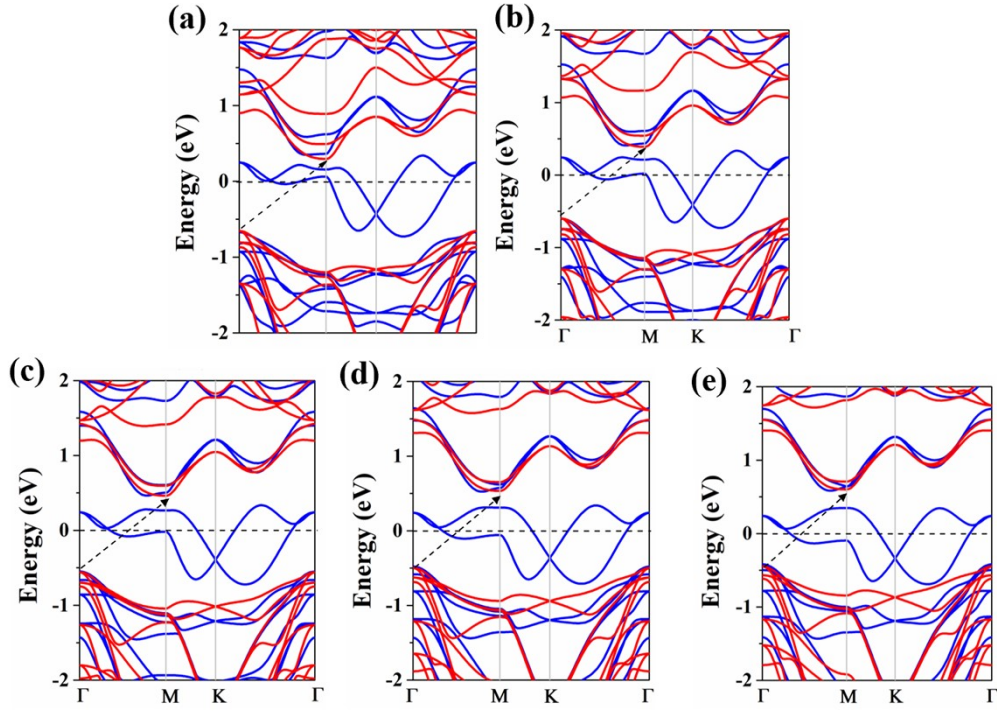

**Fig. S3** The calculated band structures of  $\text{CrSc}_2\text{Te}_4$  monolayer with different  $U$  values using the PBE method. The blue and red lines indicate the spin-up and spin-down, respectively. The Fermi level is set to be 0 eV.

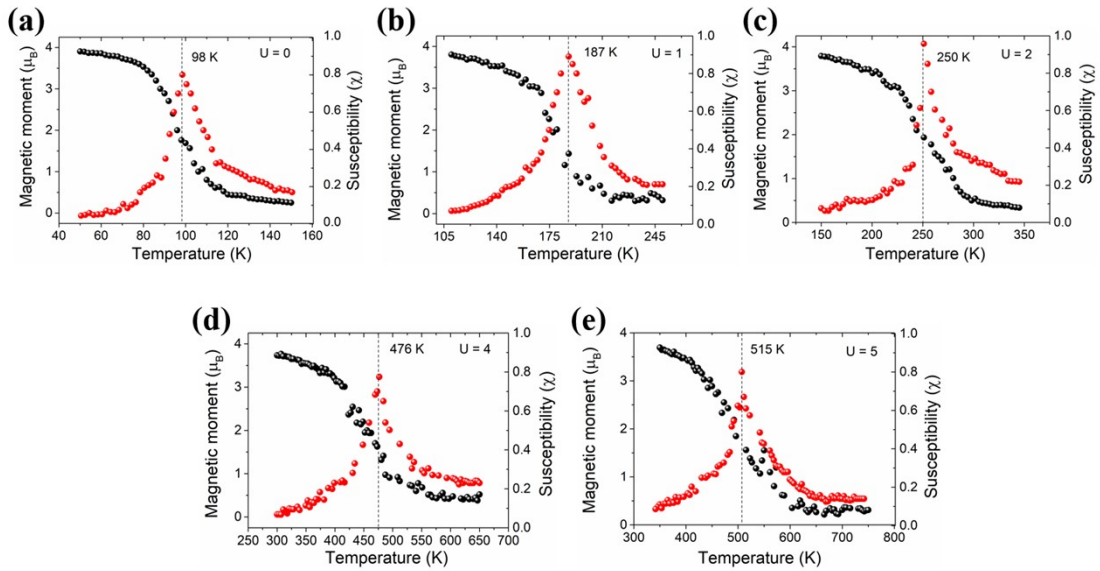

**Fig. S4** Dependence of magnetic moment and magnetic susceptibility on the temperature by the Heisenberg model *via* Monte Carlo (MC) simulation of  $\text{CrSc}_2\text{Te}_4$  monolayer with different  $U$  values.

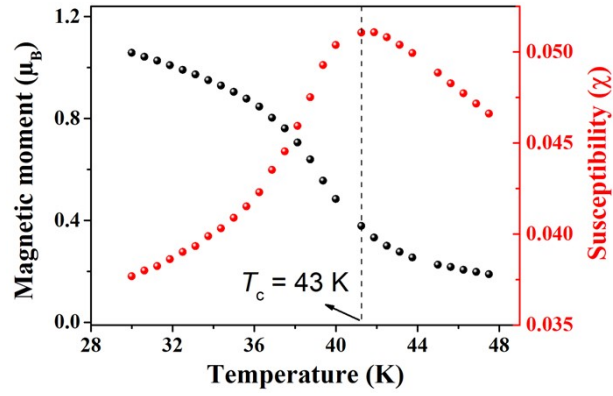

**Fig. S5** Dependence of magnetic moment and magnetic susceptibility on the temperature by the Heisenberg model *via* Monte Carlo (MC) simulation of CrI<sub>3</sub> monolayer.

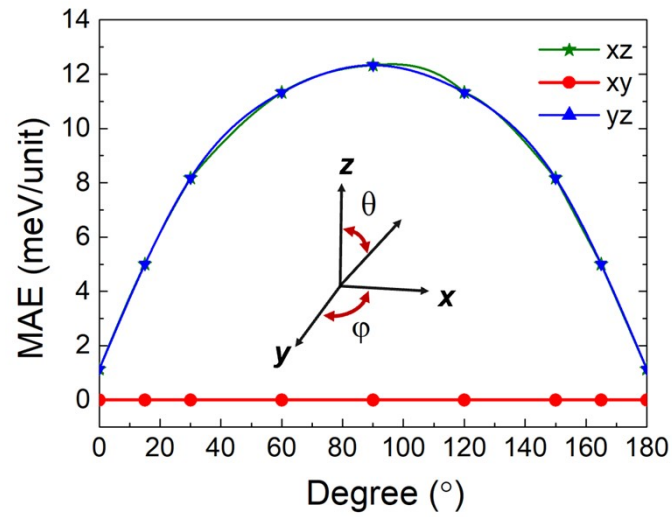

**Fig. S6** The variation of magnetic anisotropy energy (MAE) of CrSc<sub>2</sub>Te<sub>4</sub> monolayer. Among the MAE along the *xy* plane with respect to the polar angle  $\varphi$ , and along the *xz* and *yz* planes with respect to polar angle  $\theta$ .

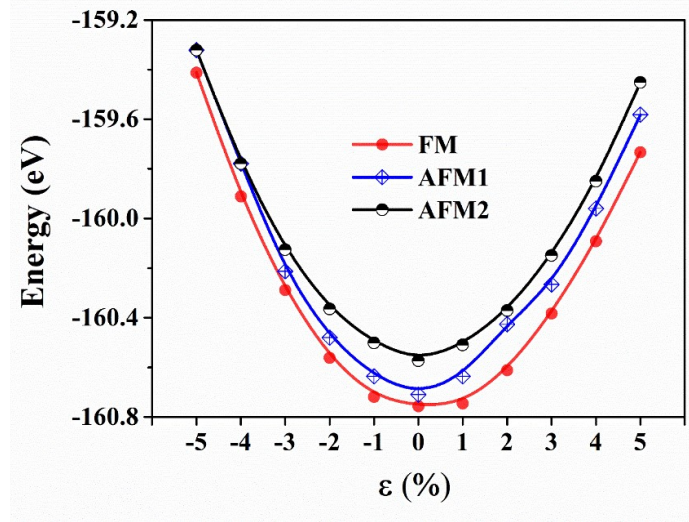

**Fig. S7** The energies of different magnetic configurations as a function of strain range from  $-5\%$  to  $5\%$ .

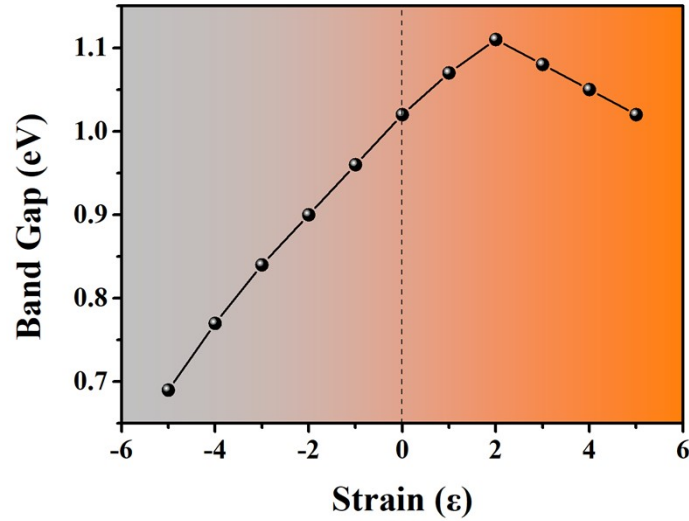

**Fig. S8** The variation of band gap of  $\text{CrSc}_2\text{Te}_4$  monolayer under strains ( $\varepsilon$ ) from  $-5\%$  to  $5\%$  using the PBE+ $U$  method ( $U = 3.0$  eV).

**Table S1** The energy of three magnetic configurations with different  $U$  values using the PBE method.

| U    | 0        | 1        | 2        | 3        | 4        | 5        |
|------|----------|----------|----------|----------|----------|----------|
| FM   | -167.776 | -165.516 | -163.456 | -161.585 | -159.962 | -158.563 |
| AFM1 | -167.531 | -165.209 | -163.143 | -161.428 | -159.892 | -158.522 |
| AFM2 | -167.526 | -165.207 | -163.139 | -161.438 | -159.902 | -158.528 |

**Table S2** Magnetic anisotropy energy (MAE, meV/Cr atom) per Cr atom between (100), (010) and (001) direction calculated for CrSc<sub>2</sub>Te<sub>4</sub> monolayer by PBE+*U* (*U* from 0 to 5 eV) method.

| <b>CrSc<sub>2</sub>Te<sub>4</sub></b> | <b><i>E</i> (100)-<i>E</i> (001)</b> | <b><i>E</i> (010)- <i>E</i> (001)</b> | <b><i>E</i> (010)-<i>E</i> (100)</b> |
|---------------------------------------|--------------------------------------|---------------------------------------|--------------------------------------|
| <b>0</b>                              | -0.428                               | -0.428                                | -0.002                               |
| <b>1</b>                              | -0.792                               | -0.794                                | -0.001                               |
| <b>2</b>                              | -1.342                               | -1.351                                | -0.003                               |
| <b>3</b>                              | -2.451                               | -2.458                                | -0.007                               |
| <b>4</b>                              | -1.206                               | -1.201                                | -0.001                               |
| <b>5</b>                              | -1.490                               | -1.493                                | -0.003                               |
